# Supplementary material
Source: PubMed Central journal article supplement (PMC6433376)

Supplementary Figure 1

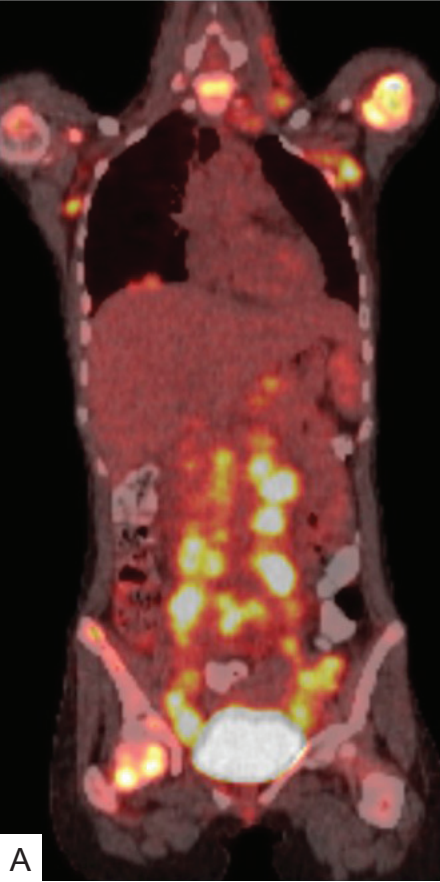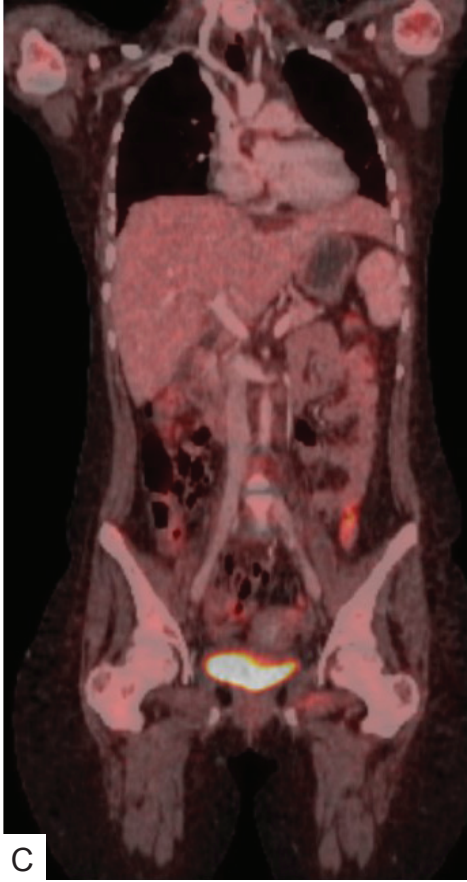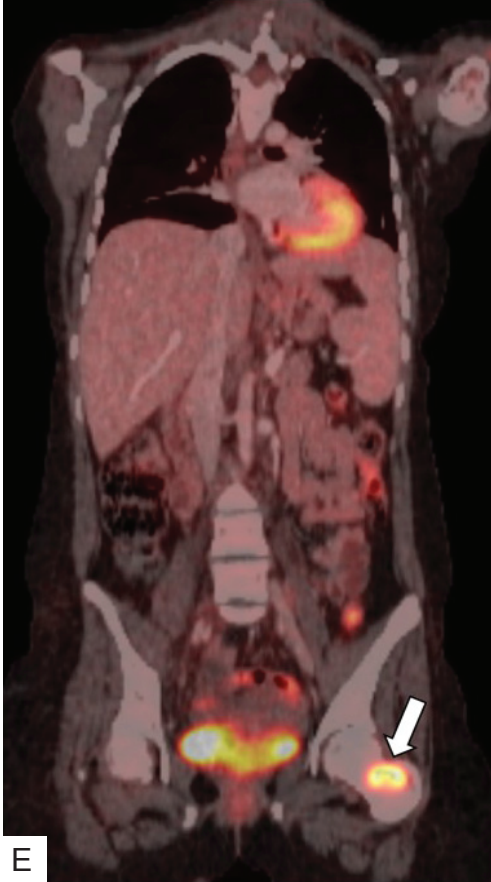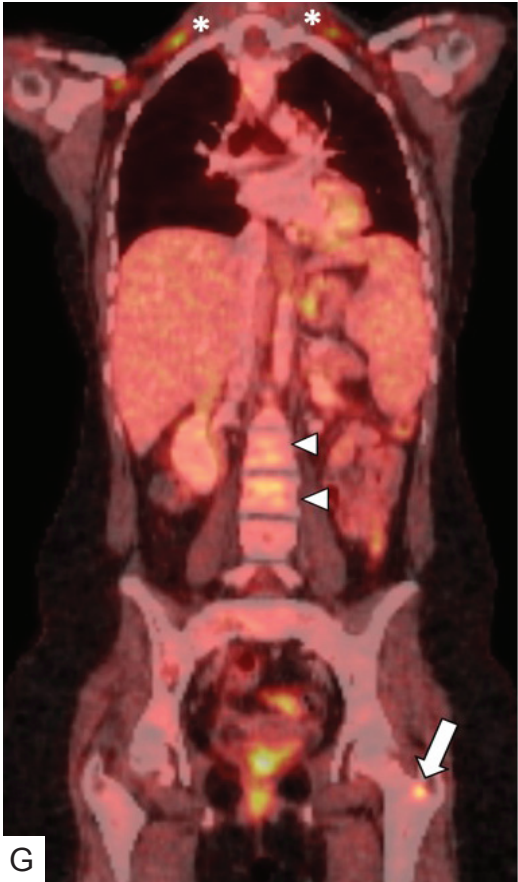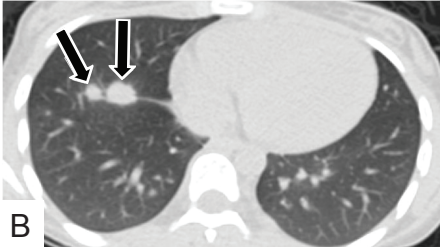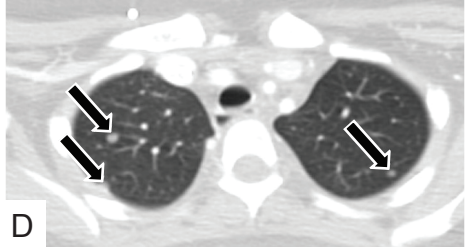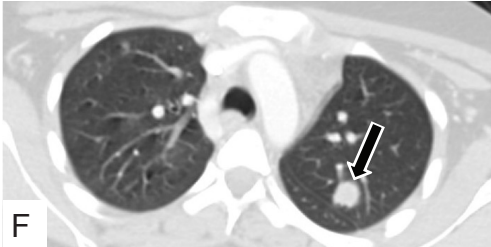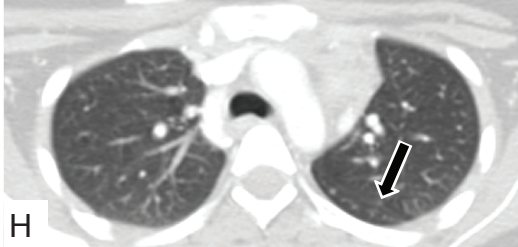

Supplement: NIHMS1009431-supplement-Supplemental_Figure_1.pdf [file NIHMS1009431-supplement-Supplemental_Figure_1.pdf]
